# Supplementary material for: Efficacy of a Mobile Health App (eMOTIVA) Regarding Compliance With Cardiac Rehabilitation Guidelines in Patients With Coronary Artery Disease: Randomized Controlled Clinical Trial
Source: PubMed Central journal article supplement (PMC11310647; doi:10.2196/55421), 2024-07-25
Supplement: mhealth_v12i1e55421_app2.pdf [file mhealth_v12i1e55421_app2.pdf]

**Multimedia Appendix 2.** Secondary outcome variables at baseline, and 3 and 6 months.

| Variable                                          |          | Total                             | Mobile health group               | Control group                     | <i>P</i> value   |
|---------------------------------------------------|----------|-----------------------------------|-----------------------------------|-----------------------------------|------------------|
| <b>Participants, n</b>                            |          |                                   |                                   |                                   | — <sup>a</sup>   |
|                                                   | Baseline | 300                               | 150                               | 150                               |                  |
|                                                   | 3 months | 287                               | 145                               | 142                               |                  |
|                                                   | 6 months | 284                               | 143                               | 141                               |                  |
| <b>BMI (kg/m<sup>2</sup>), mean (SD) (95% CI)</b> |          |                                   |                                   |                                   |                  |
|                                                   | Baseline | 28.75 (4.63)<br>(28.22-29.27)     | 28.84 (4.56)<br>(28.10-29.58)     | 28.65 (4.70)<br>(27.89-29.41)     | .72              |
|                                                   | 3 months | 28.29 (4.43)<br>(27.77-28.80)     | 28.33 (4.48)<br>(27.59-29.07)     | 28.24 (4.40)<br>(27.51-28.97)     | .86              |
|                                                   | 6 months | 28.27 (4.71)<br>(27.72-28.82)     | 28.22 (4.69)<br>(27.44-28.99)     | 28.33 (4.74)<br>(27.53-29.12)     | .69 <sup>b</sup> |
| <b>WC<sup>c</sup> (cm), mean (SD) (95% CI)</b>    |          |                                   |                                   |                                   |                  |
|                                                   | Baseline | 103.98 (11.49)<br>(102.59-105.38) | 104.44 (11.91)<br>(102.45-106.43) | 103.46 (11.02)<br>(101.50-105.42) | .49              |
|                                                   | 3 months | 102.40 (10.97)<br>(101.06-103.74) | 102.56 (11.53)<br>(100.62-104.51) | 102.22 (10.35)<br>(100.36-104.08) | .80              |
|                                                   | 6 months | 101.82 (11.36)<br>(100.43-103.21) | 101.59 (11.87)<br>(99.58-103.59)  | 102.09 (10.80)<br>(100.14-104.03) | .72              |
| <b>SBP<sup>d</sup> (mmHg), mean (SD) (95% CI)</b> |          |                                   |                                   |                                   |                  |
|                                                   | Baseline | 132.93 (20.18)                    | 133.53 (19.94)                    | 132.34 (20.47)                    | .94 <sup>b</sup> |

|                                                       |          |                                   |                                   |                                   |                    |
|-------------------------------------------------------|----------|-----------------------------------|-----------------------------------|-----------------------------------|--------------------|
|                                                       |          | (130.65-135.23)                   | (130.31-136.75)                   | (129.04-135.64)                   |                    |
|                                                       | 3 months | 131.11 (15.50)<br>(129.29-132.92) | 128.96 (15.87)<br>(126.32-131.59) | 133.27 (14.85)<br>(130.80-135.74) | .01                |
|                                                       | 6 months | 132.88 (19.67)<br>(130.57-135.19) | 130.00 (21.90)<br>(126.35-133.65) | 135.78 (16.73)<br>(132.99-138.58) | .01                |
| <b>DBP<sup>e</sup> (mmHg), mean (SD) (95% CI)</b>     |          |                                   |                                   |                                   |                    |
|                                                       | Baseline | 75.41 (11.52)<br>(74.10-76.72)    | 75.17 (12.53)<br>(73.14-77.19)    | 75.65 (10.45)<br>(73.96-77.33)    | .71                |
|                                                       | 3 months | 74.86 (10.66)<br>(73.61-76.11)    | 73.68 (9.76)<br>(72.06-75.30)     | 76.05 (11.42)<br>(74.15-77.95)    | .06                |
|                                                       | 6 months | 77.78 (10.92)<br>(76.50-79.07)    | 76.84 (11.00)<br>(75.00-78.67)    | 78.74 (10.79)<br>(76.93-80.54)    | .14                |
| <b>HR<sup>f</sup> (beats/min), mean (SD) (95% CI)</b> |          |                                   |                                   |                                   |                    |
|                                                       | Baseline | 73.07 (13.94)<br>(71.48-74.65)    | 72.63 (12.99)<br>(70.53-74.72)    | 73.51 (14.85)<br>(71.11-75.90)    | .70 <sup>b</sup>   |
|                                                       | 3 months | 69.33 (9.73)<br>(68.19-70.47)     | 66.75 (8.91)<br>(65.27-68.23)     | 71.93 (9.86)<br>(70.29-73.57)     | <.001 <sup>b</sup> |
|                                                       | 6 months | 69.31 (10.51)<br>(68.07-70.54)    | 68.20 (10.13)<br>(66.51-69.89)    | 70.43 (10.80)<br>(68.62-72.23)    | .07 <sup>b</sup>   |
| <b>Glucose (mg/dL), mean (SD) (95% CI)</b>            |          |                                   |                                   |                                   |                    |
|                                                       | Baseline | 122.27 (51.12)<br>(116.46-128.08) | 116.48 (45.55)<br>(109.13-123.83) | 128.06 (55.69)<br>(119.07-137.05) | .02 <sup>b</sup>   |
|                                                       | 3 months | 111.51 (35.10)                    | 110.58 (35.92)                    | 112.44 (34.38)                    | .48 <sup>b</sup>   |

|                                                      |          |                                   |                                   |                                   |                   |
|------------------------------------------------------|----------|-----------------------------------|-----------------------------------|-----------------------------------|-------------------|
|                                                      |          | (107.00-116.02)                   | (104.03-117.13)                   | (106.15-118.74)                   |                   |
|                                                      | 6 months | 108.10 (31.36)<br>(103.78-112.42) | 101.10 (18.57)<br>(97.51-104.70)  | 115.44 (39.46)<br>(107.61-123.27) | .007 <sup>b</sup> |
| <b>HbA<sub>1c</sub> (%), mean (SD) (95% CI)</b>      |          |                                   |                                   |                                   |                   |
|                                                      | Baseline | 6.32 (1.35)<br>(6.14-6.49)        | 6.17 (1.32)<br>(5.92-6.42)        | 6.45 (1.38)<br>(6.20-6.70)        | .01 <sup>b</sup>  |
|                                                      | 3 months | 6.43 (1.20)<br>(6.06-6.79)        | 6.61 (1.40)<br>(6.03-7.19)        | 6.19 (0.84)<br>(5.78-6.60)        | .25               |
|                                                      | 6 months | 6.57 (1.01)<br>(6.30-6.84)        | 6.44 (1.01)<br>(6.04-6.84)        | 6.69 (1.02)<br>(6.30-7.08)        | .36               |
| <b>TC<sup>g</sup> (mg/dL), mean (SD) (95% CI)</b>    |          |                                   |                                   |                                   |                   |
|                                                      | Baseline | 168.83 (46.18)<br>(163.52-174.17) | 171.97 (47.11)<br>(164.29-179.65) | 165.66 (45.16)<br>(158.27-173.05) | .24               |
|                                                      | 3 months | 116.68 (29.83)<br>(112.95-120.82) | 117.23 (29.39)<br>(111.71-122.76) | 116.54 (30.39)<br>(110.85-122.23) | .86               |
|                                                      | 6 months | 116.34 (30.79)<br>(112.04-120.63) | 113.89 (26.35)<br>(104.71-119.06) | 118.89 (34.77)<br>(111.92-125.86) | .25               |
| <b>HDL-C<sup>h</sup> (mg/dL), mean (SD) (95% CI)</b> |          |                                   |                                   |                                   |                   |
|                                                      | Baseline | 42.35 (10.95)<br>(40.92-44.33)    | 42.63 (10.34)<br>(40.92-44.33)    | 42.08 (11.57)<br>(40.16-43.99)    | .67               |
|                                                      | 3 months | 42.35 (12.67)<br>(40.65-44.05)    | 42.41 (9.67)<br>(40.58-44.25)     | 42.29 (15.18)<br>(39.38-45.20)    | .49 <sup>b</sup>  |
|                                                      | 6 months | 44.02 (11.27)                     | 43.80 (11.22)                     | 44.26 (11.38)                     | .78               |

|                                                      |          |                                   |                                   |                                   |                  |
|------------------------------------------------------|----------|-----------------------------------|-----------------------------------|-----------------------------------|------------------|
|                                                      |          | (42.39-45.65)                     | (41.54-46.07)                     | (41.87-46.64)                     |                  |
| <b>LDL-C<sup>i</sup> (mg/dL), mean (SD) (95% CI)</b> |          |                                   |                                   |                                   |                  |
|                                                      | Baseline | 101.15 (42.90)<br>(96.18-106.11)  | 104.39 (43.20)<br>(97.30-111.49)  | 97.88 (42.48)<br>(90.88-104.87)   | .19              |
|                                                      | 3 months | 54.94 (23.15)<br>(51.85-58.04)    | 54.42 (23.05)<br>(50.04-58.80)    | 55.47 (23.34)<br>(51.04-59.90)    | .79 <sup>b</sup> |
|                                                      | 6 months | 54.63 (24.14)<br>(51.17-58.09)    | 50.42 (18.67)<br>(46.66-54.19)    | 59.07 (28.23)<br>(53.22-64.91)    | .10 <sup>b</sup> |
| <b>TG<sup>j</sup> (mg/dL), mean (SD) (95% CI)</b>    |          |                                   |                                   |                                   |                  |
|                                                      | Baseline | 142.98 (77.80)<br>(134.02-151.94) | 141.62 (76.87)<br>(129.09-154.15) | 144.36 (78.99)<br>(131.39-157.32) | .96 <sup>b</sup> |
|                                                      | 3 months | 112.61 (56.35)<br>(105.17-120.05) | 109.06 (56.86)<br>(98.37-119.76)  | 116.13 (55.88)<br>(105.66-126.59) | .12 <sup>b</sup> |
|                                                      | 6 months | 107.16 (55.10)<br>(99.45-114.86)  | 108.81 (61.69)<br>(96.70-120.93)  | 105.41 (47.47)<br>(95.84-114.98)  | .93 <sup>b</sup> |

<sup>a</sup>Not applicable.

<sup>b</sup>Mann-Whitney *U* test. [Median (IQR)] mHealth vs control: BMI: 6 months [27.30 (31.22-24.97)] vs [27.14 (30.45-24.97)]; SBP: baseline [129.00 (142.00-120.00)] vs [130.00 (146.00-122.00)]; HR: baseline [70.00 (79.75-65.00)] vs [72.00 (83.00-62.00)], 3 months [67.00 (72.00-60.00)] vs [70.00 (80.00-65.00)], 6 months [67.00 (74.50-67.00)] vs [70.00 (80.00-70.00)]; glucose: baseline [103.50 (129.50-90.25)] vs [114.00 (158.50-96.00)], 3 months [93.00 (166.00-88.50)] vs [125.00 (127.00-96.00)], 6 months [90.00 (111.50-83.50)] vs [104.00 (123.00-88.00)]; HbA<sub>1c</sub>: baseline [5.70 (6.37-5.40)] vs [5.90 (7.15-5.60)]; HDL-C: 3 months [45.50 (51.50-42.25)] vs [41.00 (51.00-33.00)]; LDL-C: 3 months [61.00 (84.50-54.25)] vs [54.00 (91.00-35.00)], 6 months [54.00 (67.50-45.50)] vs [55.00 (77.50-42.75)]; TG: baseline [123.50 (174.75-95.25)] vs

[128.00 (173.00-97.00)], 3 months [130.50 (204.25-100.25)] vs [100.00 (118.00-57.00)], 6 months [100.00 (132.00-78.00)] vs [112.50 (123.00-78.75)].

<sup>c</sup>WC: waist circumference.

<sup>d</sup>SBP: systolic blood pressure.

<sup>e</sup>DBP: diastolic blood pressure.

<sup>f</sup>HR: heart rate.

<sup>g</sup>TC: total cholesterol.

<sup>h</sup>HDL-C: high-density lipoprotein cholesterol.

<sup>i</sup>LDL-C: low-density lipoprotein cholesterol.

<sup>j</sup>TG: triglyceride.
